# Supplementary material
Source: HighWire-hosted journal article supplement (https://ard.bmj.com/content/76/11/1853)
Supplement: inline-supplementary-material-1 [file inline-supplementary-material-1.docx]

**Table S1. Patient characteristics, disease activity and patient-reported outcomes at baseline**

|  | **Placebo**  **(N=488)** | **Baricitinib**  **(N=487)** | **Adalimumab**  **(N=330)** |
| --- | --- | --- | --- |
| ***Patient characteristics*** |  |  |  |
| Age, years | 53 (12) | 54 (12) | 53 (12) |
| Female patients, n (%) | 382 (78) | 375 (77) | 251 (76) |
| Duration of RA, years, mean (SD) | 10 (9) | 10 (9) | 10 (9) |
| Concomitant corticosteroid use, n (%) | 290 (59.4) | 275 (56.5) | 201 (60.9) |
| Type of csDMARDs currently used  MTX only, n (%)  MTX + other csDMARDs, n (%)  Mean (SD) MTX dose, mg/week | 398 (81.6) 89 (18.2) 14.8 (4.8) | 413 (84.8) 74 (15.2) 14.9 (4.6) | 277 (83.9) 53 (16.1) 14.6 (4.4) |
| # of prior conventional synthetic DMARDS, n (%): |  |  |  |
| 1 | 204 (42) | 243 (50) | 153 (46) |
| 2 | 169 (35) | 138 (28) | 105 (32) |
| ≥3 | 114 (23) | 106 (22) | 72 (22) |
| ***Disease activity*** |  |  |  |
| Swollen joint count, of 66 | 16 (9) | 15 (8) | 15 (9) |
| Tender joint count, of 68 | 23 (14) | 23 (13) | 23 (14) |
| hsCRP, mg/L | 20 (21) | 22 (23) | 22 (21) |
| ESR, mm/hour | 49 (26) | 49 (26) | 48 (26) |
| DAS28-hsCRP | 5.7 (1.0) | 5.8 (0.9) | 5.8 (0.9) |
| SDAI | 40 (13) | 40 (13) | 40 (13) |
| CDAI | 38 (13) | 38 (12) | 38 (13) |
| ***Patient-reported outcome measures*** |  |  |  |
| Health Assessment Questionnaire-Disability Index (HAQ-DI, 0-3) | 1.55 (0.67) | 1.57 (0.68) | 1.59 (0.70) |
| Patient’s Global Assessment of Disease Activity (0-100 mm VAS) | 61 (23) | 63 (21) | 64 (21) |
| Patient’s Assessment of Pain (0-100 mm VAS) | 60 (23) | 62 (22) | 61 (23) |
| Functional Assessment of Chronic Illness Therapy-Fatigue  (FACIT-F, 0-52) | 28.6 (10.7) | 28.1 (10.7) | 27.6 (11.4) |
| Short Form-36 (SF-36) |  |  |  |
| Physical Component Score (PCS) | 32.7 (8.5) | 32.4 (8.2) | 31.8 (9.2) |
| Mental Component Score (MCS) | 46.5 (11.8) | 46.7 (11.5) | 45.7 (12.1) |
| European Quality of Life-5 Dimensions-5 Level (EQ-5D-5L) |  |  |  |
| Health State Index Score, UK algorithm | 0.514 (0.227) | 0.514 (0.229) | 0.485 (0.261) |
| Health State Index Score, US algorithm  VAS (0-100) | 0.641 (0.156)  50.8 (20.6) | 0.641 (0.156)  50.9 (20.1) | 0.620 (0.179)  50.3 (21.5) |

Data displayed are mean (SD), unless otherwise stated.

*Abbreviations: CDAI=Clinical Disease Activity Index; csDMARDs=conventional synthetic disease modifying antirheumatic drugs; DAS28=Disease Activity Score modified to include the 28 diarthrodial joint count; ESR=erythrocyte sedimentation rate; hsCRP=high-sensitivity C-reactive protein; MTX=methotrexate; SD=standard deviation; SDAI=Simplified Disease Activity Index; VAS=visual analog scale*
